# Supplementary material
Source: Springer Nature journal article supplement (https://www.springermedizin.de/resource/supplementary/12901_2009_54_MOESM7_ESM.pdf/9515450)

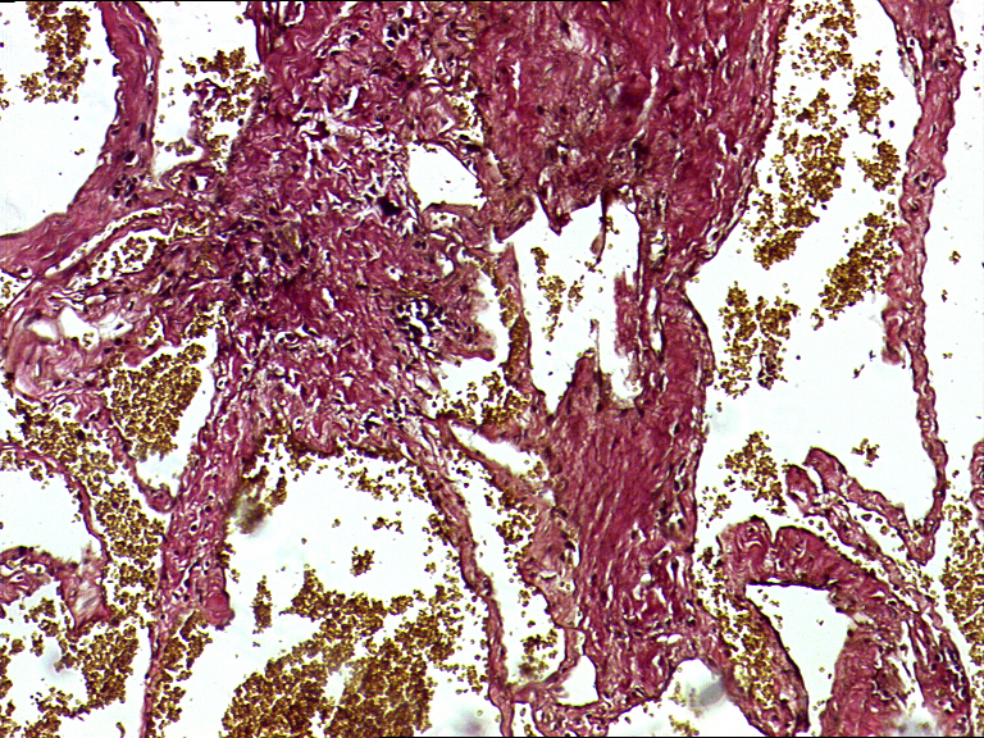

Supplement: MOESM7 [file 9515450]
